# Supplementary material for: Boundary conditions for the Middle Miocene Climate Transition (MMCT v1.0)
Source: Copernicus journal article supplement (doi:10.5194/gmd-11-1607-2018), 2018-04-24
Supplement: Supplementary file 1 [file gmd-11-1607-2018-supplement.zip]

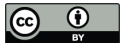

*Supplement of*

## **Boundary conditions for the Middle Miocene Climate Transition (MMCT v1.0)**

**Amanda Frigola et al.**

*Correspondence to:* Amanda Frigola ([afrigola@marum.de](mailto:afrigola@marum.de))

- [gmd-11-1607-2018-supplement-title-page.pdf](#)
- [supplement](#)
  - [MMCO\\_exp.nc](#)
  - [MMG\\_exp.nc](#)
  - [PI\\_exp.nc](#)
  - [mmco\\_topo\\_bathy\\_v1\\_0.nc](#)
  - [mmco\\_veg\\_v1\\_0.nc](#)
  - [mmg\\_topo\\_bathy\\_v1\\_0.nc](#)
  - [mmg\\_veg\\_v1\\_0.nc](#)

The copyright of individual parts of the supplement might differ from the CC BY 4.0 License.
